RESEARCH ARTICLE

# Growth and adherence of *Staphylococcus aureus* were enhanced through the PGE<sub>2</sub> produced by the activated COX-2/PGE<sub>2</sub> pathway of infected oral epithelial cells

Yuxia Wang<sup>1,2</sup>, Biao Ren<sup>1</sup>, Xuedong Zhou<sup>1,2</sup>, Shiyu Liu<sup>1,2</sup>, Yujie Zhou<sup>1,2</sup>, Bolei Li<sup>1,2</sup>, Yaling Jiang<sup>1,2</sup>, Mingyun Li<sup>1</sup>, Mingye Feng<sup>1,2\*</sup>, Lei Cheng<sup>1,2\*</sup>

**1** State Key Laboratory of Oral Diseases, Sichuan University, Chengdu, China, **2** Department of Operative Dentistry and Endodontics, West China Hospital of Stomatology, Sichuan University, Chengdu, China

\* [chenglei@scu.edu.cn](mailto:chenglei@scu.edu.cn) (LC); [fengmingye@gmail.com](mailto:fengmingye@gmail.com) (MF)

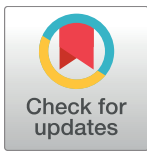

**OPEN ACCESS**

**Citation:** Wang Y, Ren B, Zhou X, Liu S, Zhou Y, Li B, et al. (2017) Growth and adherence of *Staphylococcus aureus* were enhanced through the PGE<sub>2</sub> produced by the activated COX-2/PGE<sub>2</sub> pathway of infected oral epithelial cells. PLoS ONE 12(5): e0177166. <https://doi.org/10.1371/journal.pone.0177166>

**Editor:** Bruno Lourenco Diaz, Universidade Federal do Rio de Janeiro, BRAZIL

**Received:** December 9, 2016

**Accepted:** April 24, 2017

**Published:** May 4, 2017

**Copyright:** ©2017 Wang et al. This is an open access article distributed under the terms of the [Creative Commons Attribution License](https://creativecommons.org/licenses/by/4.0/), which permits unrestricted use, distribution, and reproduction in any medium, provided the original author and source are credited.

**Data Availability Statement:** All relevant data are within the paper and its Supporting Information files.

**Funding:** This study was supported by the National Key Research and Development Program of China (<http://www.nsf.gov.cn/>) 2016YFC1102700 to X.Z.; National Natural Science Foundation of China grant (<http://www.nsf.gov.cn/>) 81372889 to L.C., 81600858 to B.R., 81372890 to M.F. and 81430011 to X.Z.; and Open Fund of State Key

## Abstract

*Staphylococcus aureus* is a major pathogen of varieties of oral mucous infection. Prostaglandin E<sub>2</sub> (PGE<sub>2</sub>) is a pro-inflammatory factor and Cyclooxygenase 2 (COX-2) is a critical enzyme of PGE<sub>2</sub> biosynthesis. The purpose of this study is to investigate whether *Staphylococcus aureus* can increase PGE<sub>2</sub> production of oral epithelial cells and how PGE<sub>2</sub> functions in the growth and adherence of *Staphylococcus aureus*. mRNA levels of COX-2, *fnbpA* and *fnbpB* were estimated by quantitative PCR. PGE<sub>2</sub> production was measured by Enzyme Linked Immunosorbent Assay (ELISA). The binding biomass of *Staphylococcus aureus* to human fibronectin was investigated by crystal violet staining and confocal laser scanning microscopy and the adherent force was measured by atomic force microscope (AFM). The COX-2 mRNA level and PGE<sub>2</sub> production were increased by *Staphylococcus aureus*. PGE<sub>2</sub> promoted the growth and biofilm formation of *Staphylococcus aureus*, enhanced the attachment of *Staphylococcus aureus* to the human fibronectin as well as to the HOK cells. The transcription of *fnbpB* was up-regulated by PGE<sub>2</sub> in both early and middle exponential phase but not *fnbpA*. These results suggest that the activation of COX-2/PGE<sub>2</sub> pathway in oral epithelial cell by *Staphylococcus aureus* can in turn facilitate the growth and the ability to adhere of the pathogen. These findings uncover a new function of PGE<sub>2</sub> and may lead to the potential of COX-2/PGE<sub>2</sub> targeting in the therapy of inflammation and cancer in both which the COX-2/PGE<sub>2</sub> pathway were observed activated.

## Introduction

In oral and maxillofacial region, *Staphylococcus aureus* is a common causative agent of the soft tissue infection and jaw osteomyelitis, both of which can hinder patients from normal diet and thus reduce their life quality [1–3]. Especially, the mouth floor cellulitis, a rampant soft tissue infection in oral and maxillofacial with *S. aureus* as a main pathogen, can rapidly spread and

Laboratory of Oral Diseases ([http://www.sklod.org/CN/index\\_cn.html](http://www.sklod.org/CN/index_cn.html)) 2040305193002; Recruitment Program for Young Professionals to M.F.. The funders had no role in study design, data collection and analysis, decision to publish, or preparation of the manuscript.

**Competing interests:** The authors have declared that no competing interests exist.

sometimes develops into life threatening events [4,5]. Additionally, the establishment of the chronic inflammation as a risk factor for carcinogenesis highlights the importance of inflammation prevention and therapy [6,7]. Unfortunately, the routine use of antibiotics in infection therapy often leads to the growing incidence of antibiotic-resistant strains of *S. aureus*. Therefore, elucidating the pathogenesis of *S. aureus* induced inflammation in oral and maxillofacial becomes essential to better understand and treat the disease.

Prostaglandin E<sub>2</sub> (PGE<sub>2</sub>) is an oxygenated metabolite of arachidonic acid. Cyclooxygenase (COX) is a restrict enzyme of PGE<sub>2</sub> biosynthesis, accounting for the conversion of arachidonic acid to prostaglandin H<sub>2</sub> (PGH<sub>2</sub>) which is subsequently catalyzed by PGE synthase into PGE<sub>2</sub> [8]. So far, three forms of COX have been found, COX-1, COX-2 and COX-3, among which COX-2 expression is inducible and is increased in many cases of inflammation and cancer [9–14]. In head and neck squamous cell carcinoma and in the oral mucosa of active smokers, for example, increased levels of COX-2 expression and PGE<sub>2</sub> production were detected according to previous reports [15,16]. Although *S. aureus* was previously shown to induce PGE<sub>2</sub> production in some cell lines [17,18], no study on the COX-2 expression in oral epithelial cell suffering from *S. aureus* infection has been found so far.

As an essential homeostatic factor, PGE<sub>2</sub> is generally recognized as a key mediator of immunopathology in chronic infections, regulating many courses of inflammation and multiple functions of some immune cells [19–21]. Accumulated evidence has made the establishment of the paradoxes of PGE<sub>2</sub> function. On the one hand, it acts as a pro-inflammatory mediator activating neutrophils, macrophages, and mast cells at early stages of inflammation [20–22]. On the other hand, it has been demonstrated to be a potent immunosuppressant suppressing both innate and specific immunity at the molecular and cellular levels [23–28]. It limits the cytolytic effector functions of NK cells [29,30] as well as inhibits the phagocytosis and pathogen-killing by alveolar macrophages [31,32], for instance. The immunosuppression of PGE<sub>2</sub> makes it a potent risk factor in inflammation. Besides, previous studies suggested that chronic inflammation promotes cancer development through COX-2/PGE<sub>2</sub> pathway [33,34]. Thus, the functional versatility of PGE<sub>2</sub> is increasingly noteworthy.

Although increasingly clear vision of the paradoxical role of PGE<sub>2</sub> in various cells in immune responses, little attention has been given to the effect of PGE<sub>2</sub> on bacterial pathogen—constitute of the inflammation environment. In *C. albicans*, PGE<sub>2</sub> was demonstrated to induce germ tube formation and involve in biofilm formation [35,36]. Jan Krause et al reported that PGE<sub>2</sub> from *C. albicans* stimulates the growth of *S. aureus* in mixed biofilms [37]. These results implied a facilitating effect of PGE<sub>2</sub> on some pathogens. The pathogenesis of bacteria usually bases on its colonization to host tissues. The ability of *S. aureus* to adhere is crucial for its early colonization to host tissue and implanted biomaterials. Fibronectin-binding proteins (FnBPs) mediating the binding of *S. aureus* to mammalian extracellular matrix of fibronectin are important for the adherence of *S. aureus* in the course of infection [38,39]. *fnbpA* and *fnbpB* are genes coding for FnBPs and contribute to the ability of *S. aureus* adhering to fibronectin-coated surfaces [40,41]. Previous studies showed that the colonization of *S. aureus* is higher in some infection and cancer tissues which have both been reported to display an inducible COX-2 expression and an increased PGE<sub>2</sub> production [9,11,42]. However, whether the higher rate of *S. aureus* colonization is resulted from the increased PGE<sub>2</sub> level has not been known. Therefore, studying the effect of PGE<sub>2</sub> on the adherence of *S. aureus* to cells is beneficial to elucidate the causal relationship between *S. aureus* colonization and inflammation or cancer.

Thus, we here in this study propose that following a challenge with *S. aureus*, oral mucosal epithelial cell can increase COX-2 expression and PGE<sub>2</sub> production and *S. aureus* can take advantage of the PGE<sub>2</sub> to grow and to adhere. To confirm our hypothesis, we investigated the

COX-2 mRNA level by qPCR and the PGE<sub>2</sub> level by ELISA in HOK cell line with or without *S. aureus* infection. Also, we investigated the effect of PGE<sub>2</sub> on *S. aureus* growth and adherence. The results indicated that *S. aureus* can activate the COX-2/PGE<sub>2</sub> pathway in HOK and that PGE<sub>2</sub> can promote the growth and biofilm formation of *S. aureus*, facilitate the ability of *S. aureus* to fibronectin and to HOK cells, and up-regulate the transcriptional level of *fnbpB* in *S. aureus*. Our results uncovered a new function of PGE<sub>2</sub> in the interaction between *S. aureus* and oral epithelial cells in the inflammation, directing a new preventive and therapeutic guide for *S. aureus* infection.

## Materials and methods

### Cell line, bacterial strain and culture

The cell line of human oral keratinocyte (HOK) was cultured in high glucose Dulbecco's modified Eagle Medium (DMEM, Hyclone, Logan, UT, USA) containing L-glutamine (2mM) with 10% Fetal bovine serum (FBS, Gibco, Thermo Fisher Scientific, Inc., Waltham, MA, USA), 1% penicillin–streptomycin antibiotic mixture (PS, Hyclone, Logan, UT, USA). The cells were cultured in an incubator with 5% CO<sub>2</sub> and 95% air at 37°C. Cells were passaged at regular intervals depending on their growth characteristics using 0.25% trypsin (Hyclone, Logan, UT, USA). *Staphylococcus aureus* strain ATCC 25923 was routinely cultured in Tryptone soya broth (TSB, Oxoid, Basingstoke, UK) and 1.5% agar was added when needed.

For the infection assay, exponential phase *S. aureus* was centrifuged at 4000rpm for 15min and washed twice with sterile PBS. The pellet was suspended in fresh DMEM without FBS and PS and the suspension was diluted to the required cell density corresponding to  $\sim 1 \times 10^8$  CFUs/mL. HOK was incubated in 6-wells plates for 48h with either 0.025% dimethyl sulfoxide (DMSO) or 20μM NS-398 (Sigma-Aldrich; Saint Louis, Missouri), a specific COX-2 inhibitor, dissolved in DMSO at an optimal dose that was previously determined to provide inhibition of COX-2 [18,43,44]. Then, the NS-398- or DMSO-treated cells were infected with *S. aureus* at MOI of 100:1. *S. aureus* suspensions and HOK cells without infection were as negative control and wells without HOK incubation but added with DMEM or *S. aureus* suspension were as blank control. All the wells were incubated at 37°C, 5% CO<sub>2</sub> for 45min. the supernatants were collected and filtrated with 0.22μm microfiltration membrane and stored at -80°C for ELISA or supernatant assay. After being washed with PBS, cells were lysed with TRIzol Reagent (Invitrogen, California, USA) and stored at -80°C for RNA extraction.

### RNA extraction and quantitative real-time PCR

To quantify mRNA of COX-2, *fnbpA* and *fnbpB*, total RNA was isolated from  $\sim 1 \times 10^6$  HOK cells or from  $\sim 5 \times 10^8$  bacterial cells following the instructions provided with TRIzol reagent (Invitrogen, California, USA). Total RNA yield and purity were determined by absorbance at 260 nm and 280 nm using a NanoDrop-2000 spectrophotometer (Thermo Fisher Scientific Inc., Waltham, MA, USA). cDNA was then synthesized using the PrimeScript RT reagent Kit with gDNA Eraser (Takara Clontech, Japan) according to the manufacturer's instructions. Real-time PCR was performed on a C1000 Touch™ Thermal Cycler instrument (Bio-Rad, Philadelphia, PA, USA) with the SYBR reagent (Takara, Dalian, China) following the manufacturer's instructions. The amplification was performed according to the reported protocol with some modifications [45]. A 25-μl mixture of 12.5 μL SYBR qPCR Mix (Takara, Dalian, China), 2 μL PCR primers mix (10 μM), 2 μL diluted template cDNA, and 8.5 μL deionized distilled water was prepared for each gene and subjected to 40 cycles of three steps consisting of denaturation at 95°C for 3 min, denaturation at 95°C for 5 s, annealing at 60°C for 30 s, followed by a melt curve started at 65°C to 95°C with an increment of 0.5°C for 5S. Relative fold changes

**Table 1. Primers used in this study.**

| Genes        | PCR primers                       | Description and product size             |
|--------------|-----------------------------------|------------------------------------------|
| <i>cox-2</i> | For 5' -TCCTGAAACCCACTCCCAACA-3'  | Cyclooxygenase 2                         |
|              | Rev 5' -TGGGCAGTCATCAGGCACAG-3'   | 242 bp[46]                               |
| GAPDH        | For 5' -GTCTTCACTACCATGGAGAAGG-3' | glyceraldehyde-3-phosphate dehydrogenase |
|              | Rev 5' -TCATGGATGACCTTGGCCAG-3'   | 197bp [46]                               |
| <i>fnbpA</i> | For 5' -ACCGTCAAACGCAACACAAG-3'   | Fibronectin-binding protein A            |
|              | Rev 5' -TTCTGATGCCGTTCTTGGCT-3'   | 259bp                                    |
| <i>fnbpB</i> | For 5' -GCTGCAGCATCGGAACAAA-3'    | Fibronectin binding protein B            |
|              | Rev 5' -TGCTTGCACAGTTTTCGGTG-3'   | 201bp                                    |
| 16S          | For 5' -TTGGTCCTGAGGTGGTTTG-3'    | Normalizing internal standard            |
|              | Rev 5' -CGCATACAATGGCGCAGTTT-3'   | 113bp                                    |

<https://doi.org/10.1371/journal.pone.0177166.t001>

of COX-2 were normalized against glyceraldehyde-3-phosphate dehydrogenase (GAPDH) expression and *fnbpA* and *fnbpB* were normalized against *S. aureus* 16S expression. PCR primers used in this study are listed in Table 1. The amplification efficiency and template specificity for each primer pair were verified and all the assays were conducted with each sample in triplicate.

### PGE<sub>2</sub> ELISA

The supernatant collection for PGE<sub>2</sub> measurement was described above. Simply, HOK cells were cocultured with *S. aureus* at a MOI of 100:1 in DMEM without FBS for 45 min. the supernatants were harvested, filtrated and the PGE<sub>2</sub> content was measured by ELISA (Cayman Chemical, Ann Arbor, MI) according to the manufacturer's instructions with each sample in triplicate [47].

### *Staphylococcus aureus* growth and biofilm formation

Exogenous PGE<sub>2</sub> (Sigma-Aldrich) was dissolved in absolute ethanol to prepare the stock solution of 10mg/mL and the aliquots were stored at -20°C protected from light. For experiment, the aliquots of stock solution were diluted in sterile PBS to obtain the desired concentrations. The overnight culture of *S. aureus* was diluted 1:10 into fresh TSB. Then, PGE<sub>2</sub> dilutions were added into the diluted *S. aureus* cultures at the final concentrations of 0 pg/mL, 20 pg/mL, 50 pg/mL, 100 pg/mL and 500 pg/mL. The mixtures of *S. aureus* and PGE<sub>2</sub> were then transferred into the flat-bottom 96-wells cell culture cluster (Corning, NY, USA). Wells containing equal volume of fresh TSB were used as negative controls. The plates were incubated at 37°C aerobically for 18 h. For the planktonic growth measurement, the plate was incubated in the BioTek microplate reader (Gene Company, American) with shaking per 5 seconds and reading per hour. For the biofilm assay, *S. aureus* was cultured in TSB medium (containing 5% FBS) added with PGE<sub>2</sub> (500 pg/mL) or with PBS and then the culture was transferred into the flat-bottom 96-well cell culture cluster as described above. The plates for biofilm formation were incubated at 37°C statically and after 18h incubation, Liquid medium was removed and the wells were gently rinsed two times with sterile distilled water to remove the planktonic or loosely bound cells. Biofilms were stained with crystal violet (CV) solution as described by Peeters *et al* with a few modifications [48]. Briefly, biofilms cultured in 96-well plates were fixed with glutaraldehyde. Then, 50 µL of 0.1% crystal violet solution was added to each well and incubated for 20 min at room temperature. Excess CV was removed by washing under running tap water and bounded CV was released by 200 µL of 99% ethanol. Absorbance was measured at 570 nm

with a Thermo Scientific Multiskan GO reader (Thermo Fisher Scientific Inc., Waltham, MA, USA)

### Fibronectin assay

Binding of *S. aureus* to solid-phase fibronectin was measured as described previously [49,50] with some modification. Briefly, flat-bottomed polystyrene 96-well plates (Corning, NY, USA) were coated with 100  $\mu$ L fibronectin (10  $\mu$ g/mL in PBS) isolated from human plasma (Sigma-Aldrich) for 1 h at 37°C. Fibronectin solution was removed and replaced with a blocking solution of Bovine Serum Albumin (BSA, 2%, w/v) in PBS overnight at 4°C. Wells were washed three times with sterile PBS prior to the addition of bacterial suspension. The overnight *S. aureus* culture was diluted with fresh TSB that was added with PGE<sub>2</sub> (500 pg/mL) or added with PBS at the same volumes. Then, the condition dilutions were cultured to the exponential phase. The cultures were centrifuged at 4°C, 4000 rpm for 15 min. The pellets were washed three times and resuspended with PBS. After adjustment to achieve a similar initial cell density, the cultures were diluted 1:10 with DMEM without FBS and antibiotics. 200  $\mu$ L (approx.  $2 \times 10^6$  bacteria) of the diluted cells were transferred in quadruplicate into the wells coated with fibronectin and, as a negative control, into the uncoated wells blocked with BSA. Plates were incubated at 37°C for 1 h. All wells were rinsed three times with PBS to remove unbound bacteria. Adherent bacteria were fixed with glutaraldehyde [200  $\mu$ L; 2% (v/v) in PBS] for 1 h at room temperature. After rinsing, bacteria in 96-well microtitre plates were stained with 50  $\mu$ L crystal violet (final concentration 0.01%, w/v) for 15 min. Wells were rinsed three times with sterile water and allowed to air dry. 200  $\mu$ L 99% ethanol was added to each experimental well and the plates were shaken for several minutes to induce dye release. The quantity of biomass was represented by OD<sub>570</sub> measured with a Thermo Scientific Multiskan GO Reader.

### Confocal laser scanning microscopy for *S. aureus* adhesion to fibronectin

A flat-bottom 24-well plate with cover glasses in the bottoms was coated and blocked by the protocol described above for the fibronectin assay. The prepared bacterial suspensions pre-cultured with PGE<sub>2</sub> at 0pg/mL or 500pg/mL were added into the prepared wells. The plate was cultivated at 37°C aerobically for 1 h and 3 h without agitation. The glass slides were dyed with a SYTO-9 staining (Molecular Probes, Eugene, OR, USA). After incubation at room temperature in the dark for 15 min, the samples were fixed with mounting oil that protected against fluorescence quenching, immobilized by nail polish on slides and stored at 4°C away from the light before being scanned by a Leica TCS SP2 confocal laser scanning microscopy (CLSM, Leica, German). All the samples were observed by an oil lens and images were at the same magnification of 630 $\times$ . The excitation/emission for scanning were 480nm/500nm respectively following the instruction and the interval was 1  $\mu$ m. Images were recorded from signal appeared to signal disappeared and analyzed by a LAS AF Lite software without zoom in.

### Measurement of adhesion forces

The cover glasses were coated with human fibronectin as protocol described in the CLSM assay and slides without fibronectin coated were used as control. The preparation of bacterial AFM tips and the measurement of adhesion forces were followed the protocol from study by Chuanyong Wang et al [51]. Briefly, the overnight *S. aureus* culture was diluted and incubated in fresh TSB broth with (500 pg/mL) or without PGE<sub>2</sub> to exponential phase. Then the cultures were centrifuges at 4°C 4000rpm for 15 min and washed twice with PBS and resuspended in adhesion buffer (2 mM potassium phosphate, 50 mM potassium chloride, 1 mM calcium

chloride; pH 6.8) [52]. The bacterial suspensions were then sonicated 3 times (10 s working with 5 s waiting each) to scatter bacteria clumps. The CSC38/tipless AFM probe (Ultrasharp, m-Masch, Tallinn, Estonia) were sterilized under UV for 5 min and the half length of the cantilever was dipped into a drop of 0.01% (w/v) poly-L-lysine (Sigma, Poole, UK) for 1 min. After being dried for 2 min in air, the probes were immersed in bacterial suspension for 1 min and were applied for adhesion force measurement immediately. For each probe, two coated and two un-coated slides were measured with 6–8 positions being randomly selected for every slide and each position being repeated at least ten times. Each sample was tested with at least three tips. Every time after used, the tip was detected under a Scanning electron micrograph (SEM) to confirm the intactness of the bacteria layer on the modified cantilever. The force data was disposed once the integrity of bacterial layer was damaged.

### Adherent and invasion assay

The adherent and invasion assay was carried out as previously described with some modification [18,53]. Briefly, the suspension of exponential *S. aureus* in DMEM was prepared as the protocol for the infection assay. The completely confluent cell layers in 24-well plates were rinsed twice with sterile PBS and added with *S. aureus* suspension for each well at the MOI of 100:1. Equal volumes of *S. aureus* suspensions were simultaneously added into wells without cells to monitor the growth of *S. aureus* in DMEM in the experimental periods. Following 45 min cultured, the *S. aureus* was ten-time step diluted and the dilutions were plated on the TSA agar plates and the HOK cells were washed three times with sterile PBS. For adherent assay, 1 mL of 0.1% Triton X-100 (Amresco, Solon, OH, USA) was added into each well and incubated for 5 min at 37°C to lyse the cells. The lysates were ten-time step diluted and the dilutions were plated on the TSA agar plates. Meanwhile, for the invasion assay, other cells were incubated in DMEM containing gentamicin (100 µg/mL) for 1 h to kill the remaining extracellular bacterial cells and then the cells were lysed and plated after rinsed as the protocol described above for the adherent assay. The plates were incubated at 37°C for 24 h and the single clones were calculated.

### The supernatant assay

HOK cells were pretreated with 20 µM NS-398 or with 0.025% DMSO for 48 h and then infected with *S. aureus* at MOI of 100:1. Cells uninfected were as negative control and DMEM and *S. aureus* suspension were as blank control. All the wells were incubated at 37°C, 5% CO<sub>2</sub> for 45 min and the supernatants were collected by centrifuged and filtrated. The overnight culture of *S. aureus* was diluted with fresh TSB. Then, the diluted cultures were added with the conditional cell supernatants at the final concentration of 20% or added with PGE<sub>2</sub> at the concentration of 136.5 pg/mL which equals to the quantity of PGE<sub>2</sub> in the supernatants added. After incubated to the exponential phase, the cultures were ten-time step diluted, plated on the TSA agars and incubated at 37°C for 24 h. Or, the cultures were centrifuged at 4000 rpm for 15 min at 4°C, rinsed with sterile PBS and suspended in fresh DMEM. After being adjusted to the same density, the *S. aureus* suspensions were added into the 96-well plates coated with fibronectin (1 µg per well) for the fibronectin assay or added into 24-well plates with confluent HOK layers for the adherent assay as described above.

### Statistical analysis

All experiments were performed in triplicate and results are representative of at least three independent experiments. Comparisons between groups were analyzed by analysis of variance

(ANOVA) unless otherwise stated. Data are expressed as means ± SE and results were considered to be statistically significant where *P* < 0.05.

## Results

### Induction of COX-2 mRNA expression and PGE<sub>2</sub> production in HOK after exposure to *S. aureus*

Previous studies showed that *S. aureus* can induce PGE<sub>2</sub> production in nasal fibroblasts and murine osteoblasts [17,18]. To investigate whether COX-2 expression in normal oral epithelial cell can be induced by *S. aureus* infection, we quantified COX-2 mRNA by qPCR and PGE<sub>2</sub> production by ELISA with HOK cell line as a model of normal oral epithelium. As shown in Fig 1, the level of COX-2 mRNA in *S. aureus*-infected HOK doubles that in HOK without infection (Fig 1A). In accordance with gene regulation, the PGE<sub>2</sub> production by the *S. aureus*-infected HOK was significantly higher than that by the un-infected HOK, 682 pg/mL and 505 pg/mL respectively, that is 35% higher for the infected *S. aureus* than the un-infected one (Fig 1B).

Considering that COX-2 is not the only restrict enzyme for PGE<sub>2</sub> production, we additionally determined whether *S. aureus*-stimulated increase of PGE<sub>2</sub> production was COX-2 derived. By adding NS-398, a small-molecule specific inhibitor of COX-2, into the culture of HOK with or without *S. aureus* infection, we found that the level of PGE<sub>2</sub> both decreased remarkably and the *S. aureus*-stimulated increase of PGE<sub>2</sub> production by HOK infection was disappeared, displaying a similarly low level to that in control cell (Fig 1B). Collectively, these results indicate that *S. aureus* up-regulates COX-2 transcription which subsequently leads to PGE<sub>2</sub> production increased in infected HOK.

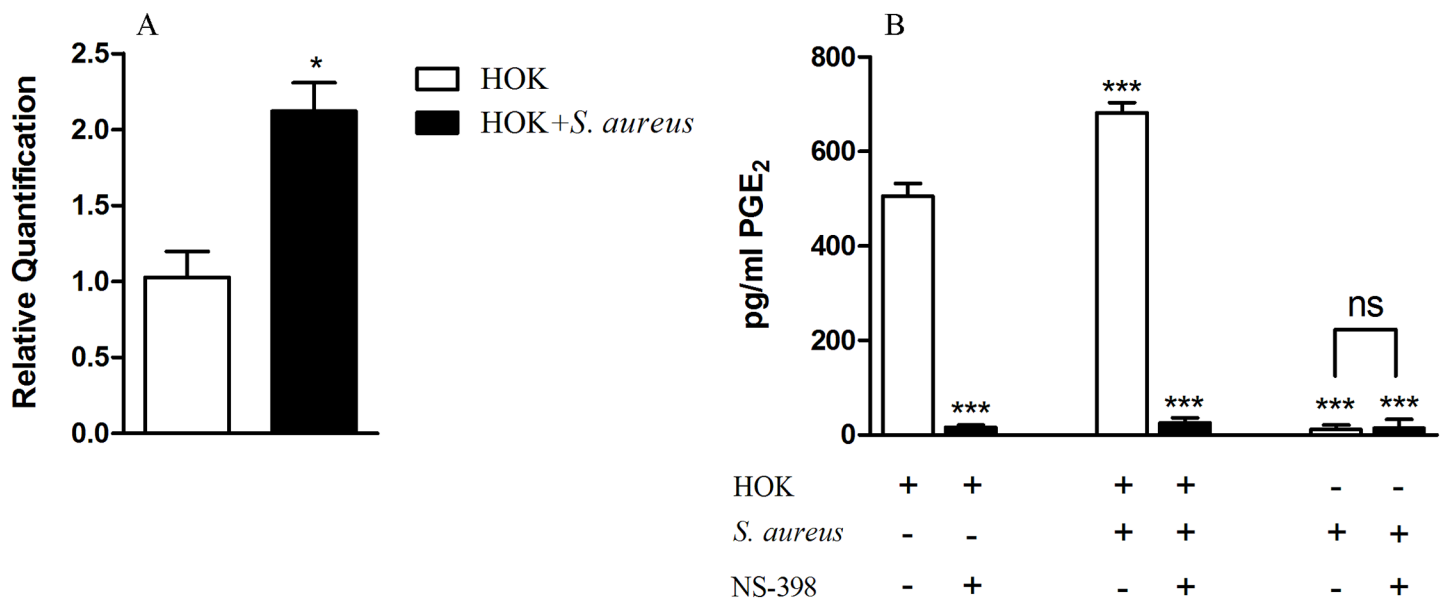

**Fig 1. *S. aureus* increases the expression of COX-2 mRNA and PGE<sub>2</sub> production by HOK.** HOK cells were pretreated with 20µM NS-398 or with 0.025% DMSO for 48 h. Then, the cells were infected with *S. aureus* at the MOI of 100:1 for 45 min. *S. aureus* suspension and the HOK without infection were as negative control and DMEM as the blank control. After the infection, the supernatants were collected by centrifuging at 2000 rpm for 25 min and filtrating with 0.22 µm filter membrane and used for PGE<sub>2</sub> ELISA. The conditional cells were lysed with TRIzol reagent and used for RNA extraction and qPCR. **A.** Fold changes of COX-2 mRNA. The level of COX-2 mRNA in *S. aureus*-infected HOK doubles that in HOK without infection. **B.** The quantity of PGE<sub>2</sub>. The PGE<sub>2</sub> production by the *S. aureus*-infected HOK was 682 pg/mL, significantly higher than that by the un-infected HOK which was 505 pg/mL. Data are expressed as means ± standard errors from three independent experiments and asterisks represent significant differences (*P* < 0.05) compared with HOK.

<https://doi.org/10.1371/journal.pone.0177166.g001>

## Changes in the growth and biofilm formation of *S. aureus* after treatment with PGE<sub>2</sub>

To investigate the impact of PGE<sub>2</sub> on *S. aureus*, we first studied the growth and biofilm formation of *S. aureus* in presence of different concentration of purified PGE<sub>2</sub>. As shown in Fig 2A, *S. aureus* in presence of 20pg/mL PGE<sub>2</sub> has a similar growth rate to the control. However, the growth rate of *S. aureus* treated with 50pg/mL PGE<sub>2</sub> was higher than that of the control and the increase in the growth rate was more significantly in *S. aureus* treated with PGE<sub>2</sub> at the concentration of 100 pg/mL and 500 pg/mL. The results indicated that PGE<sub>2</sub> facilitates *S. aureus* growth in a dose-dependent manner.

Biofilm is the main form in which bacterial exist and function. Thus, we investigated the effect of PGE<sub>2</sub> on the biofilm formation of *S. aureus*. Consistent with the facilitation to the growth in planktonic state, similar increase effect by PGE<sub>2</sub> was observed on the biofilm formation of *S. aureus*. Biofilm formation of *S. aureus* in presence to PGE<sub>2</sub> was twice as that by *S. aureus* in absence to PGE<sub>2</sub> (Fig 2B). These results indicated that PGE<sub>2</sub> exerts a facilitated effect on *S. aureus* growth and biofilm formation.

## Changes in the attachment of *S. aureus* to human fibronectin after treatment with PGE<sub>2</sub>

The adherence of *S. aureus* to cells is one of its pathogenic factors. Previous studies showed that the binding of cell-wall ligands of *S. aureus* to fibronectin plays a major role in the cause of adherence and invasion [38–41]. Therefore, fibronectin assay was performed to investigate whether PGE<sub>2</sub> has an effect on the attachment of *S. aureus* to human fibronectin. 96-well plates and the cover slips in 24-well plates were coated with fibronectin, at 1μg per well for 96-well plates and 5μg per well for 24-well plates, at 37°C for 1h with uncoated wells and slips as the blank control. Then, plates and cover slips were blocked overnight at 4°C. Exponential *S.*

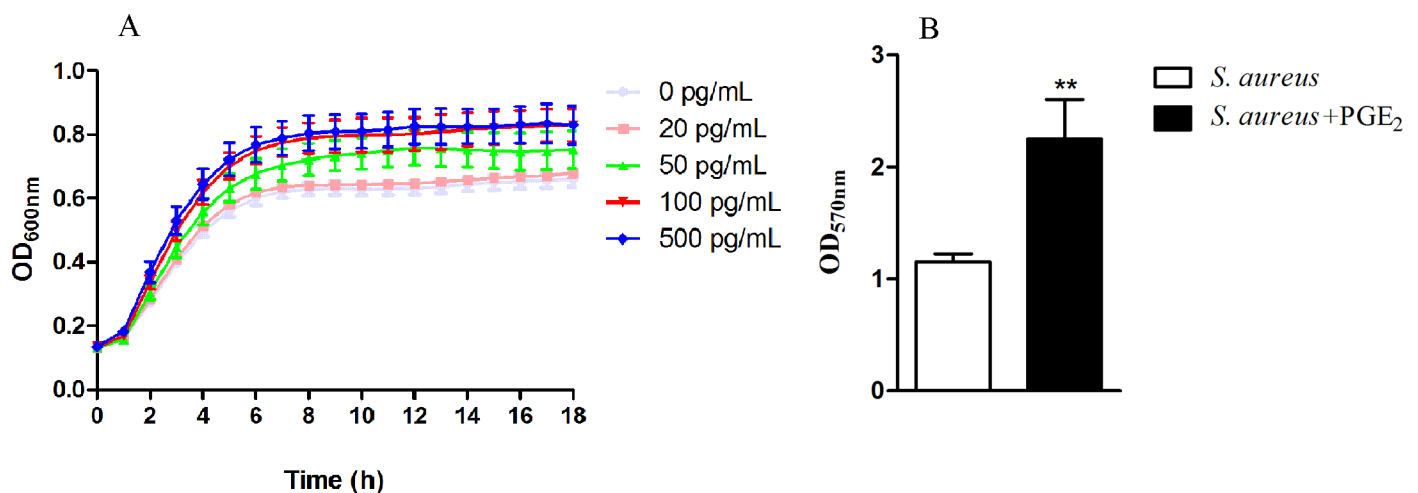

**Fig 2. PGE<sub>2</sub> stimulates the growth and biofilm formation of *S. aureus*.** *S. aureus* was cocultured with PGE<sub>2</sub> at the final concentrations of 0 pg/mL, 20 pg/mL, 50 pg/mL, 100 pg/mL and 500 pg/mL in 96-well plates for 18 h and the growth curves were recorded by the BioTek microplate reader. Or, *S. aureus* cultured in TSB containing 5% FBS was incubated with PGE<sub>2</sub> (500 pg/mL) or with PBS for 18 h and the biofilms were quantified with 0.1% (w/v) crystal violet staining. **A.** The growth curves of planktonic *S. aureus* with or without PGE<sub>2</sub> treatment. PGE<sub>2</sub> facilitated the growth of *S. aureus* in a dose-dependent manner. The facilitated effect of PGE<sub>2</sub> on *S. aureus* growth was observed at the concentration of 50 pg/mL compared with the control and the facilitation was more significant at the concentration of 100 pg/mL, 200 pg/mL and 500 pg/mL. **B.** The biofilms quantified by crystal violet staining and measured at the optical density of 570 nm. Biofilm formation of *S. aureus* in presence of PGE<sub>2</sub> was twice as that by *S. aureus* in absence of PGE<sub>2</sub>. Results are expressed as means ± standard errors from three replicates per experiment. Asterisks indicate significant ( $P < 0.05$ ) differences compared to HOK without PGE<sub>2</sub> treatment.

<https://doi.org/10.1371/journal.pone.0177166.g002>



*aureus* pretreated with PGE<sub>2</sub> (500 pg/mL) or PBS was incubated in the conditional 96- or 24-well plates at 37°C. The adherent biomass of *S. aureus* was estimated by CV staining at 1 hour after incubation or by CLSM at 1 hour and 3 hour after incubation. As shown in Fig 3A, compared to *S. aureus* without PGE<sub>2</sub> stimulation, the adherent biomass of *S. aureus* cocultured with PGE<sub>2</sub> was significantly more, approximately 6.3-fold increased. Additionally, CLSM assay confirmed the result of CV quantification. As shown in Fig 3B and 3C, after 1 hour or 3 hour cultured, the fluorescent *S. aureus* on the slides coated with fibronectin showed higher density than that on the slides without fibronectin, confirming the mediated role of fibronectin in the binding between *S. aureus* and cells. Additionally, the fluorescent dense intensity on the slides by *S. aureus* cocultured with PGE<sub>2</sub> was higher than that by *S. aureus* in the absence of PGE<sub>2</sub> both at the 1 hour and at the 3 hour time points, no matter with or without fibronectin treatment. The CV and CLSM results indicated that PGE<sub>2</sub> facilitates the adherence of *S. aureus* to fibronectin.

### Changes in the adhesion force of *S. aureus* to human fibronectin after PGE<sub>2</sub> treatment

Cover slips were coated or not coated with fibronectin. CSC38/tipless probes were pretreated with 0.01% (w/v) poly-L-lysine and attached with *S. aureus* treated or untreated with PGE<sub>2</sub> (500pg/mL). The adhesion force of *S. aureus* to human fibronectin or to blank slides was immediately measured by AFM. As shown in Fig 4, the adhesion forces to the control glasses without fibronectin coated are not different between the PGE<sub>2</sub> treated and un-treated *S. aureus*. Both of the two groups displayed a low force value, that is, 11.19 nN for un-treated *S. aureus* and 15.24 nN for PGE<sub>2</sub>-treated *S. aureus* respectively. However, when the cover glasses were coated with human fibronectin, the adhesion force of either un-treated *S. aureus* or PGE<sub>2</sub>-treated *S. aureus* was significantly stronger as compared to their respective control uncoated-glasses, confirming the promotion of fibronectin to *S. aureus* adhesion force. Notably, the adhesion force of *S. aureus* with PGE<sub>2</sub> treatment (92.87 nN) is remarkably higher than that of all other groups. For *S. aureus* without PGE<sub>2</sub> treatment, although the adhesion force was markedly enhanced by fibronectin (from 11.19 nN of the control group to 21.99 nN of the fibronectin-coated group), the force value is much less than the 92.87 nN of PGE<sub>2</sub>-treated *S. aureus*, indicating the significant enhancement of PGE<sub>2</sub> to the adhesion force of *S. aureus* to human fibronectin.

### Changes in the mRNA levels of *fnbpA* and *fnbpB* after PGE<sub>2</sub> treatment

To investigate how PGE<sub>2</sub> facilitates the adherent ability of *S. aureus*, we further examined the transcriptions of *fnbpA* and *fnbpB*, two genes coding for the fibronectin-binding proteins that mediate the binding of *S. aureus* to the mammalian fibronectin. As shown in Fig 5, in both the early and the middle exponential phase, the transcriptional level of *fnbpA* was not significantly different between the control *S. aureus* and PGE<sub>2</sub>-treated *S. aureus*. However, the *fnbpB* transcription level of PGE<sub>2</sub>-treated *S. aureus* is much higher than that of *S. aureus* without PGE<sub>2</sub> treatment. In detail, the transcriptional level of *fnbpB* of PGE<sub>2</sub>-treated *S. aureus* is 73% higher than that of un-treated *S. aureus* in the early exponential phase (Fig 5A) and 67% higher in the middle exponential phase (Fig 5B), indicating that PGE<sub>2</sub> up-regulated *fnbpB* but did no regulation to *fnbpA*.

### Changes in the adherence and invasion of *S. aureus* to HOK after PGE<sub>2</sub> treatment

Based on the results of fibronectin assay, we further investigated whether PGE<sub>2</sub> also has a facilitated effect on the adherence and invasion of *S. aureus* to HOK cells. *S. aureus* precultured

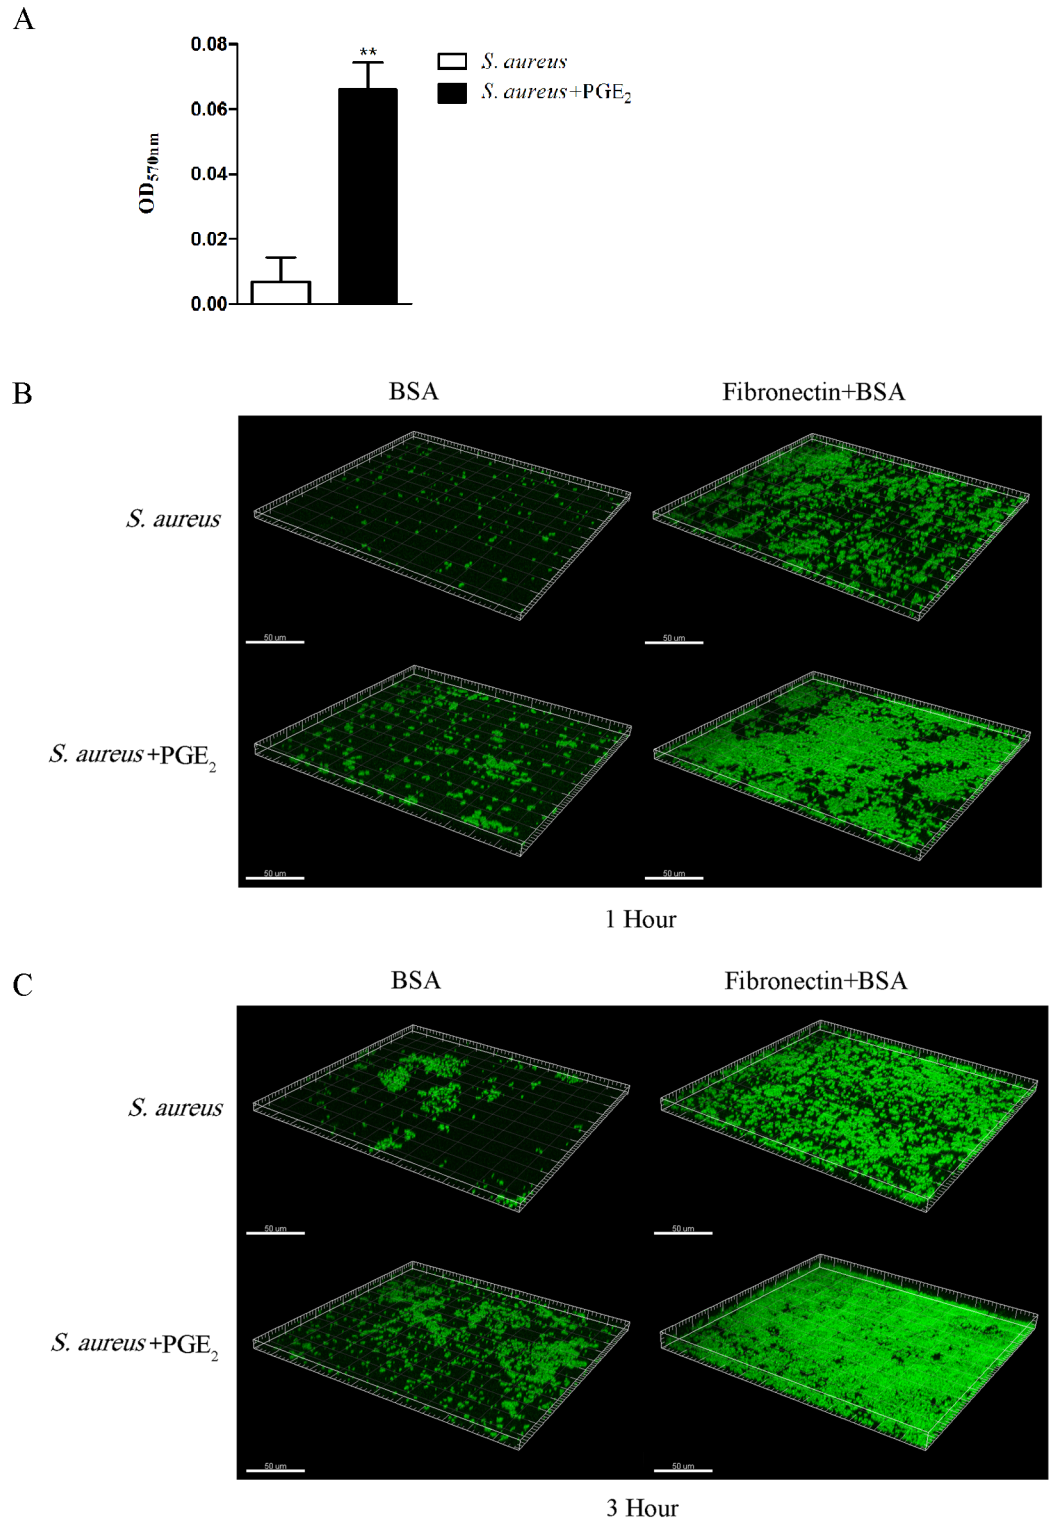

**Fig 3. PGE<sub>2</sub> facilitates the attachment of *S. aureus* to human fibronectin.** The fibronectin, was coated at 1 μg per well in 96-well plates and 5 μg per well in 24-well plates set with cover slips at 37°C for 1h, with uncoated wells and slips as the blank control. Then, plates and cover slips were blocked overnight at 4°C. Exponential *S. aureus* pretreated with PGE<sub>2</sub> (500 pg/mL) or PBS was incubated in the conditional 96- or 24-well plates at 37°C. The adherent biomass of *S. aureus* was estimated by CV staining at 1 hour after incubation or by CLSM at 1 hour and 3 hour after incubation. **A.** The biomass of attached *S. aureus* quantified with crystal violet staining and expressed

as the optical density at 570 nm. The adherent biomass of *S. aureus* cocultured with PGE<sub>2</sub> was approximately 6.3-fold increased than that by *S. aureus* without PGE<sub>2</sub> treated. Data are expressed as means ± standard errors from three replicates per experiment. Asterisks indicate significant ( $P < 0.05$ ) differences compared to HOK without PGE<sub>2</sub>. **B.** The confocal laser scanning microscopy for attached *S. aureus* biomass after incubation for 1 hour. **C.** The confocal laser scanning microscopy for attached *S. aureus* biomass after incubation for 3 hours. At both 1 h and 3 h time points, slides coated with fibronectin displayed higher fluorescent dense intensity than the uncoated ones and, no matter fibronectin treatment or not, the slides were attached with PGE<sub>2</sub>-treated *S. aureus* more than the untreated ones. Samples were observed by an oil lens and images were at the same magnification of 630× and analyzed by the LAS AF Lite software without zoom in. The experiments were performed in triple and three images were randomly captured from each sample.

<https://doi.org/10.1371/journal.pone.0177166.g003>

with or without PGE<sub>2</sub> were adjusted to the same CFUs and cocultured with the confluent HOK cells at a MOI 100:1 for 45min. Cells with or without gentamicin treatment were then lysed with triton X-100 and the lysate was ten-time step diluted with PBS and plated on the TSA plates. As shown in Fig 6A, the adherent rate of PGE<sub>2</sub>-stimulated *S. aureus* is significantly higher than that of the control without PGE<sub>2</sub> stimulation, 27% and 23% respectively. Inconsistently, the invasion rate of *S. aureus* in presence of PGE<sub>2</sub> is lower than that in absence of PGE<sub>2</sub>,

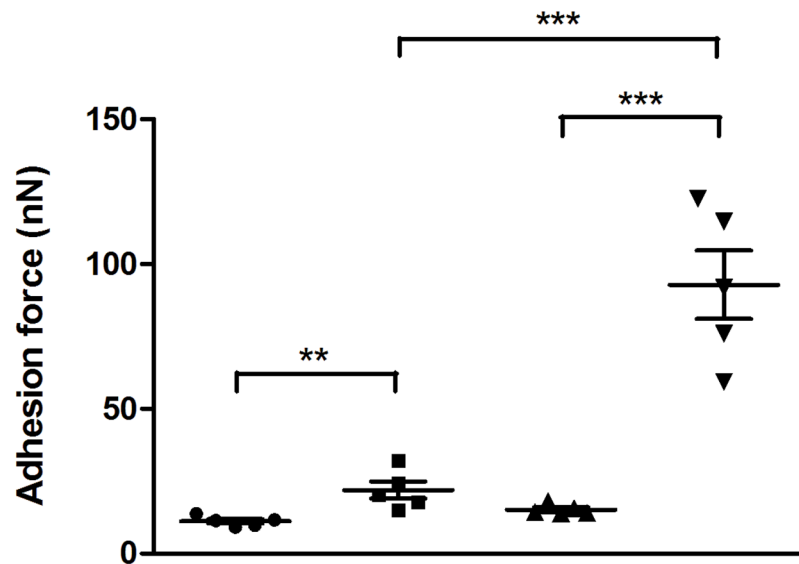

|                  |   |   |   |   |
|------------------|---|---|---|---|
| <i>S. aureus</i> | + | + | + | + |
| PGE <sub>2</sub> | - | - | + | + |
| Fibronectin      | - | + | - | + |

**Fig 4. PGE<sub>2</sub> enhances the adhesion force of *S. aureus* to human fibronectin.** Exponential *S. aureus* cocultured with PGE<sub>2</sub> (500 pg/mL) or with PBS was harvested and resuspended in adhesion buffer. The CSC38/tipless AFM probes were coated with 0.01% (w/v) poly-L-lysine for 1 min, dried in air for 2 min, and then immersed in bacterial suspension for 1 min. The adhesion force of *S. aureus* to fibronectin or to blank slides was immediately measured by AFM. For *S. aureus* without PGE<sub>2</sub> treatment, the mean adhesion force to the un-coated slides was 11.19 nN and to the fibronectin-coated slides was 21.99 nN. For the PGE<sub>2</sub>-treated *S. aureus*, the mean adhesion force to the un-coated slide was 15.24 nN and to the coated slides was 92.87 nN. The adhesion force of *S. aureus* to fibronectin was stronger than that to the smooth glass slide surface and PGE<sub>2</sub> significantly enhanced the force to fibronectin. Each sample was tested with at least three tips and for each probe, two slides were measured. The force data from tip with the integrity of bacterial layer damaged was disposed. Data are expressed as means ± standard errors from three independent experiments and asterisks represent significant differences ( $P < 0.05$ ).

<https://doi.org/10.1371/journal.pone.0177166.g004>

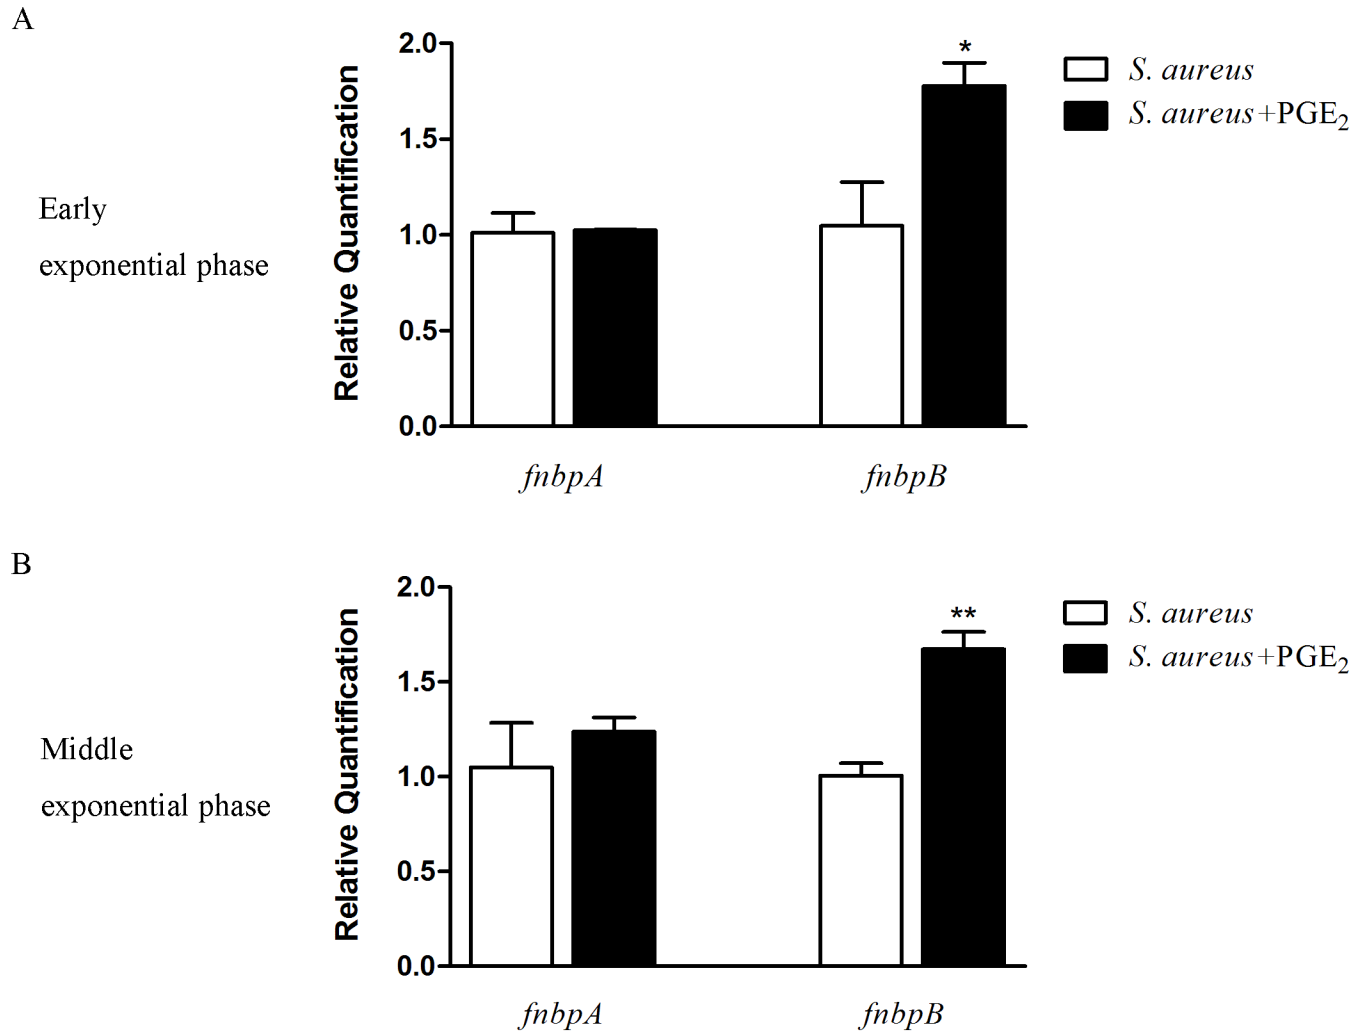

**Fig 5. PGE<sub>2</sub> up-regulates the expression of *fnbpB* but not *fnbpA* mRNA.** *S. aureus* were treated with PGE<sub>2</sub> (500 pg/mL) or with PBS and bacterial cells were harvested at both the early and the middle exponential phase. Total RNA of *S. aureus* was isolated from ~5×10<sup>8</sup> bacterial cells using TRIzol reagent following the manufacturer's instruction. cDNA was synthesized using the PrimeScript RT reagent Kit and qPCR was performed with the SYBR reagent. **A.** The transcriptional level of *fnbpA* and *fnbpB* mRNA in the early exponential phase. The level of *fnbpB* mRNA of PGE<sub>2</sub>-treated *S. aureus* is 73% higher than that of un-treated *S. aureus* and the level of *fnbpA* mRNA had no differences between the two groups. **B.** The transcriptional level of *fnbpA* and *fnbpB* mRNA in the middle exponential phase. The level of *fnbpB* mRNA of PGE<sub>2</sub>-treated *S. aureus* is 67% higher than that of un-treated *S. aureus* and the level of *fnbpA* mRNA had no differences between the two groups. All values were normalized against *S. aureus* 16S rRNA expression. Results are representative of three independent experiments and represent the means ± standard errors for three separate cultures. The asterisk represents significant differences ( $P < 0.05$ ) compared with the control *S. aureus* that was not pre-cultured with PGE<sub>2</sub>.

<https://doi.org/10.1371/journal.pone.0177166.g005>

implying multiple layer of PGE<sub>2</sub> functions at different stages of *S. aureus* infection to HOK cells under a fine regulatory mechanism (Fig 6B). Collectively, the results of the adherent assay indicated that PGE<sub>2</sub> facilitates *S. aureus* to adhere to HOK cells.

### The confirmation for the effect of PGE<sub>2</sub> on *S. aureus* with cell supernatants

As confirmed above, *S. aureus* infection induces PGE<sub>2</sub> production by HOK and the purified PGE<sub>2</sub> displayed a facilitated role not only in the planktonic growth but also in the adherence of *S. aureus*. To further investigate whether the produced PGE<sub>2</sub> by HOK has similar facilitated

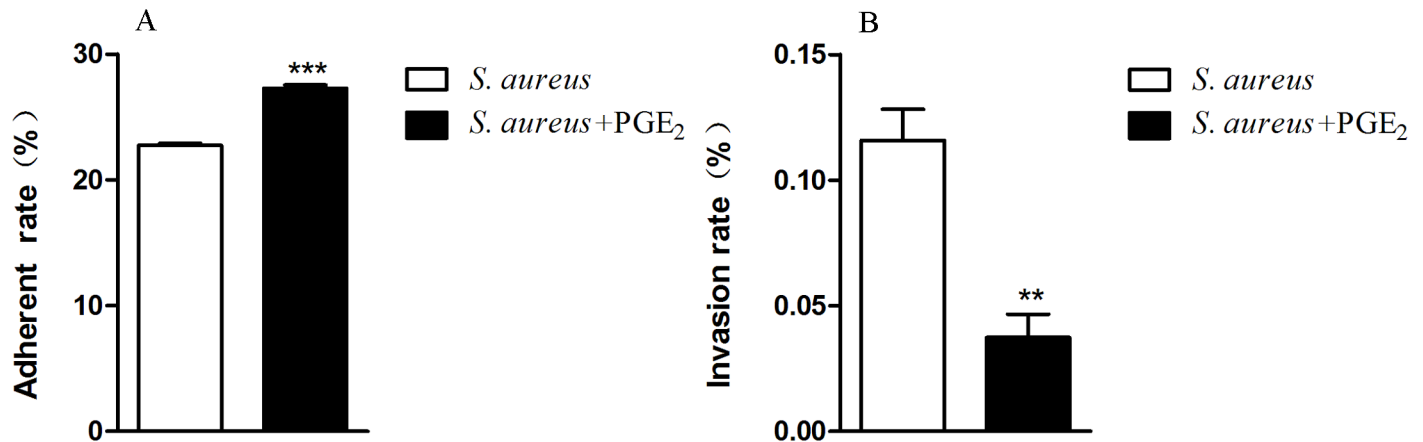

**Fig 6. PGE<sub>2</sub> enhances the adherence but inhibits the invasion of *S. aureus* to HOK.** Exponential *S. aureus* treated with PGE<sub>2</sub> (500 pg/mL) or PBS was used to infect HOK cells at a MOI of 100:1 for 45 min. Then, the cells were lysed with 1 mL of 0.1% Triton X-100 at 37°C for 5 min, ten-time step diluted and plated on the TSA agar plates. Or, the cells were treated with gentamicin (100 µg/mL) for 1 h and then lysed and plated as above. **A.** The adherence rate of *S. aureus* to HOK cells. The adherent rate of PGE<sub>2</sub>-stimulated *S. aureus* is 27%, significantly higher than the 23% of the control. **B.** The invasion rate of *S. aureus* to HOK cells. The invasion rate of PGE<sub>2</sub>-treated *S. aureus* is lower than the control. The invasive *S. aureus* was represented as the number of *S. aureus* in lysates of gentamicin-treated cells and the adherent *S. aureus* was represented as the difference between *S. aureus* in lysates of cells without gentamicin killing and that in lysates of gentamicin-treated cells. The adherence rate and invasion rate were respectively expressed as the ratio of adherent *S. aureus* to the total number of incubated *S. aureus* and the ratio of invasive *S. aureus* to the total number of incubated *S. aureus*. Data are expressed as means ± standard errors from three independent experiments and asterisks represent significant differences ( $P < 0.05$ ) compared with *S. aureus* without PGE<sub>2</sub> preculture.

<https://doi.org/10.1371/journal.pone.0177166.g006>

effect on *S. aureus*, we subsequently performed the supernatant assay. NS-398- or DMSO-treated HOK cells were infected with *S. aureus* for 45 min at a MOI of 100:1 with uninfected cells as negative control and DMEM and *S. aureus* suspension as blank control. Then, the supernatants were collected and used, at the final concentration of 20%, for stimulating *S. aureus*. Or, exogenous PGE<sub>2</sub> was added into *S. aureus* cultures at the concentration of 136.5 pg/mL which equals to the quantity of PGE<sub>2</sub> in the infected HOK supernatant. Results from the growth assay by the method of CFUs count revealed that CFUs of *S. aureus* in presence of the supernatants from uninfected HOK or treated with the supernatants from infected HOK were significantly more than that of the control. And *S. aureus* treated with supernatants from infected HOK displayed the highest growth rate than others. However, when HOK cells were pretreated with NS-398, the supernatants displayed no effect on *S. aureus* growth. Notably, the increase in growth rate of *S. aureus* was recovered by adding the same concentration of exogenous PGE<sub>2</sub> into *S. aureus* cultures. These results indicated that the COX-2 derived PGE<sub>2</sub> produced by HOK can promote the growth of *S. aureus* (Fig 7A).

Additionally, the effects of the supernatants on the adherence of *S. aureus* to fibronectin and HOK cells were also investigated. As shown in Fig 7B and 7C, supernatants from HOK with or without *S. aureus* infection both enhanced the adherent rate of *S. aureus*, and the infected HOK supernatant displayed more significant promotion than the uninfected HOK supernatant to *S. aureus* adherence. Also, the supernatants from NS-398-treated cells had no effect on the adherent of *S. aureus* to both fibronectin and HOK cells. However, the facilitated effect was reversed when the NS-398-treated cells supernatants were supplemented with exogenous PGE<sub>2</sub> in the same concentration of that found in the infected HOK supernatants. The collective results indicated that PGE<sub>2</sub> produced by HOK can in turn impact the growth and adherence of *S. aureus*.

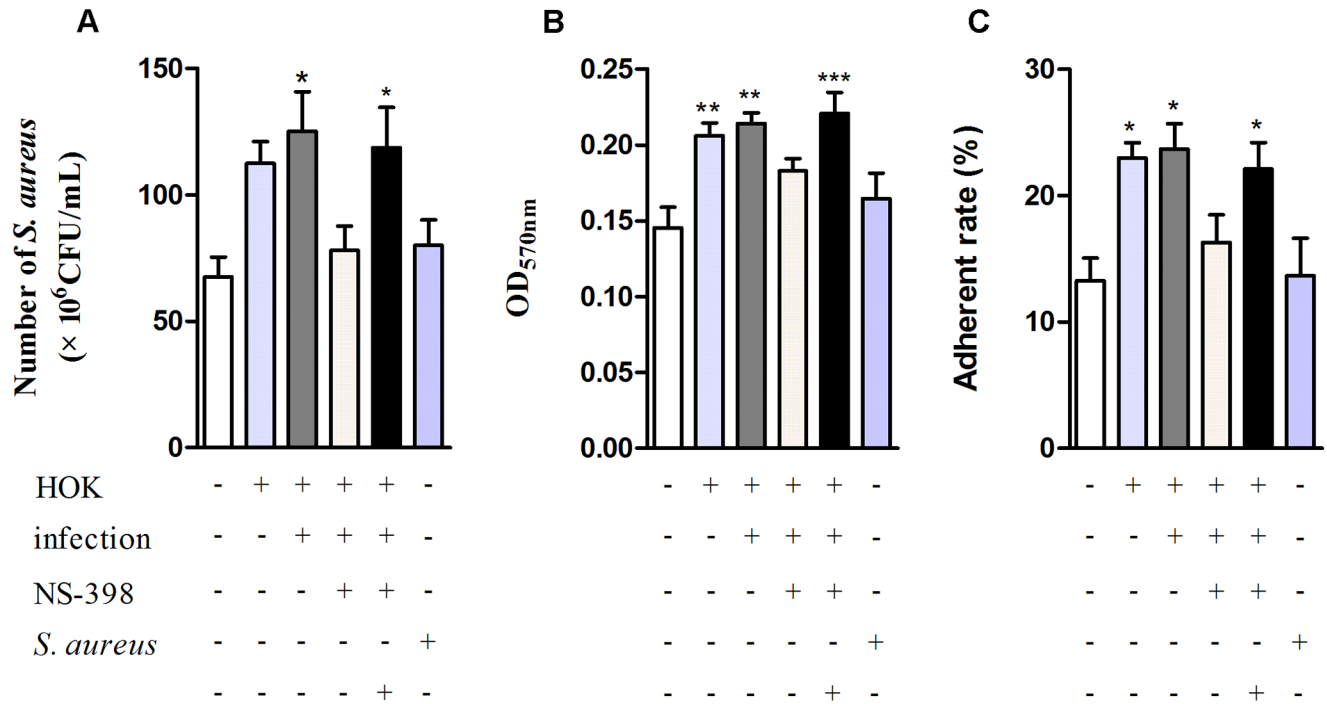

**Fig 7. Supernatants containing PGE<sub>2</sub> produced by HOK facilitate the growth and adherence of *S. aureus*.** NS-398- or DMSO-treated HOK cells were infected with *S. aureus* for 45 min at a MOI of 100:1, with the uninfected cells as negative control and DMEM and *S. aureus* suspension as blank controls. Then, the supernatants were collected and used, at the final concentration of 20%, for the stimulation of *S. aureus*. Or, exogenous PGE<sub>2</sub> was added into *S. aureus* cultures at the concentration of 136.5 pg/mL which equals to the quantity of PGE<sub>2</sub> in the infected HOK supernatant added. The growth and adhesion rate to HOK of *S. aureus* were evaluated with CFU count and the attachment of *S. aureus* to fibronectin was estimated by CV staining. Supernatants are abbreviated to “sup.” in the shown figures. **A.** The effect of supernatants on the growth of *S. aureus*. Sup-H and Sup-Hi can increase the growth of *S. aureus* but Sup-S and Sup-Hi398 can't. The addition of PGE<sub>2</sub> recovered the promoted effect of Sup-Hi398, which was inhibited by NS-398, on *S. aureus* growth. **B.** The effect of supernatants on the adherence of *S. aureus* to fibronectin. The attached biomass of *S. aureus* incubated with Sup-H and Sup-Hi was more than that of untreated *S. aureus*. Sup-S and Sup-Hi398 had no effect on the attachment of *S. aureus* to fibronectin. However, the addition of PGE<sub>2</sub> into Sup-Hi398 made it regain the facilitated effect on the attachment *S. aureus* to fibronectin. **C.** The effect of supernatants on the adherence of *S. aureus* to HOK cells. The adhesion rates of *S. aureus* simulated with Sup-H and Sup-Hi were ~23% and 24% respectively, higher than that of the untreated *S. aureus* (~13%). *S. aureus* incubated with Sup-S and Sup-Hi398 displayed similar adhesion rates, ~16% and ~14% respectively, to the untreated *S. aureus*. The addition of PGE<sub>2</sub> made the Sup-Hi398 regain the facilitated effect on the adherence of *S. aureus* to HOK cells. Sup-H: supernatant from untreated HOK; Sup-Hi: supernatant from infected HOK without NS-398 treated; Sup-Hi398: supernatant from HOK treated with NS-398 and infection. Sup-S: supernatant from *S. aureus* suspension. Data are expressed as means  $\pm$  standard errors from three independent experiments and asterisks represent significant differences ( $P < 0.05$ ) compared with *S. aureus* without any supernatant added.

<https://doi.org/10.1371/journal.pone.0177166.g007>

## Discussion

*S. aureus* is the main pathogen of many oral infections among which some can threaten patients' life [4,5]. Thus, studying the behavior of *S. aureus* during the infection is helpful to better understand the mechanism in which *S. aureus* causes inflammation. In the present study, we demonstrated that *S. aureus* can induce COX-2 transcription and increase PGE<sub>2</sub> production in oral epithelial cell line HOK. PGE<sub>2</sub> promotes the growth of *S. aureus* and the binding of *S. aureus* to fibronectin. Importantly, we demonstrated that PGE<sub>2</sub> facilitates the adherence of *S. aureus* to the oral epithelial cell. So far as we know, our study provides the first evidence for the facilitated role of PGE<sub>2</sub> in *S. aureus* adherence.

Previous studies have indicated that COX-2 expression is increased in some cases of inflammation and cancer [11,13–15]. Increased level of PGE<sub>2</sub> has been detected in the head and neck squamous cell carcinoma [54–56]. Report by Dimitrios Moraitis indicated that levels of COX-2 are increased by activating epidermal growth factor receptor (EGFR) in the oral mucosa of active smokers versus never smokers [16]. Here in this study, we first showed that *S. aureus*

up-regulated COX-2 transcription and PGE<sub>2</sub> production by normal oral epithelial cell line HOK. Consistent with this finding, increased PGE<sub>2</sub> levels resulted from *S. aureus* infection were detected by Pérez-Novo in nasal tissue fibroblasts [17] and by Somayaji in murine osteoblasts [18]. Considering that PGE<sub>2</sub> synthesis is involved with several enzymes, we thus used NS-398, a COX-2 specific inhibitor [57,58], to establish the role of COX-2 with respect to production of PGE<sub>2</sub> during *S. aureus* infection of oral epithelial cell. After being treated with NS-398, both uninfected and *S. aureus*-infected HOK cells produced a significantly attenuated level of PGE<sub>2</sub>, which remarkably lower than that by cells without NS-398 treatment. These results indicate that *S. aureus* can increase COX-2 derived PGE<sub>2</sub> production by HOK.

Intensive researches on PGE<sub>2</sub> make the paradox and versatility of PGE<sub>2</sub> function established. However, few studies hitherto have directly addressed the effects of PGE<sub>2</sub> on bacterial pathogens. Recently Jan Krause reported that PGE<sub>2</sub> produced by *C. albicans* displayed a stimulatory effect on the growth of *S. aureus* [37]. Consistently, we in this study found that both the purified and the produced PGE<sub>2</sub> promoted *S. aureus* growth and biofilm formation at the experimental concentration. The observation that supernatant from HOK treated with NS-398 and infection failed to stimulate *S. aureus* growth and the addition of PGE<sub>2</sub> reversed the facilitated effect that inhibited by NS-398 on *S. aureus* growth further confirmed that the enhanced growth of *S. aureus* is resulted from the PGE<sub>2</sub> produced by HOK cells.

Fibronectin is a multifunctional extracellular matrix that plays a central role in cell adhesion and in the attachment of various of microorganisms to human tissues [59,60]. *S. aureus* is the first bacterium shown to bind to fibronectin [61]. In this study, the binding of *S. aureus* to the fibronectin-coated surfaces is remarkably more than that to the uncoated surfaces, confirming the promotion of fibronectin to *S. aureus* attachment. Furthermore, our study first indicated that PGE<sub>2</sub> significantly facilitated the ability of *S. aureus* to adhere to purified fibronectin, which manifested as the increased number of attached bacterial cells and the higher adhesion force value in the PGE<sub>2</sub>-treated *S. aureus* group than that in other control groups. Besides, the facilitated effect of PGE<sub>2</sub> on the adhesion of *S. aureus* was also observed in the adherent assay to the oral epithelial cell line HOK. Through incubating *S. aureus* in absence of cells in the same condition during the adherent assay, we testified that the facilitation of PGE<sub>2</sub> to attachment is not resulted from its growth promoting (S1 Fig).

The binding of *S. aureus* to fibronectin is mediated by cell-wall anchored fibronectin-binding proteins which encoded by two genes of *fnbpA* and *fnbpB*. According to study by Greene et al, the double mutant of *fnbpA* and *fnbpB* in *S. aureus* displayed severely impaired adherent ability to coverslips obtained from tissue cages implanted [41]. In this study, the transcriptional level of *fnbpB* mRNA was remarkably up-regulated by PGE<sub>2</sub> both in the early and in the middle exponential phase. However, in the both phases, no change was observed in *fnbpA* transcription between the PGE<sub>2</sub>-treated and un-treated *S. aureus*. The transcriptional results of *fnbpA* and *fnbpB* indicated that PGE<sub>2</sub> can in part regulate the transcription of genes coding for fibronectin-binding proteins. Several observations supported that *S. aureus* colonization is significantly higher in some cancer patients than that in the healthy [62–64] and COX-2 appears as frequently upregulated in tumor cells [65,66]. Take the Cutaneous T-cell lymphomas (CTCL) as an example, COX-2 expression has recently been proven in CTCL cells, and treatment with the selective COX-2 inhibitor celecoxib resulted in decreased cell growth and viability [66]. Meanwhile, as Nguyen and Talpur reported, patients with CTCL have a significantly higher rate of *S. aureus* than the general population [42,67]. Accordingly, our findings, in the present study, that PGE<sub>2</sub> facilitates the growth and adherence of *S. aureus* supplies a reasonable presumption that the high rate of *S. aureus* colonization in cancers may in part attribute to the promoted impacts of PGE<sub>2</sub> to the pathogen. Furthermore, based on the findings from this study and the study by Dimitrios Moraitis who reported that PGE<sub>2</sub> production was

increased in the oral mucosa of smokers [16], it is conceivable that the elevated PGE<sub>2</sub> levels may cause a higher risk of *S. aureus* colonization in the oral mucosa of smokers. Thus, an active protection from *S. aureus* infection is essential for smokers.

Through binding to fibronectin which is simultaneously bound to integrin  $\alpha 5\beta 1$ , *S. aureus* can be internalized into host cells. In the present study we also showed that PGE<sub>2</sub> displayed an inhibitory role in the invasion of *S. aureus* to HOK cells, contrary to the facilitated impact on the adherence. The inconsistent roles of PGE<sub>2</sub> in the attachment and invasion of *S. aureus* may be due to the complicated mechanism by which *S. aureus* invades to cells. For example, observed evidence indicated that although  $\alpha 5\beta 1$  is expressed ubiquitously on human cells, the invasion level varies largely between host cells of different tissues [38,39,53,68,69]. Additionally, previous studies demonstrated that fibronectin promoted the binding of bacterial to polymorphonuclear leukocytes and macrophages but it didn't facilitate ingestion or killing of the microorganisms [70,71]. Thus, the ability of *S. aureus* to use PGE<sub>2</sub> to enhance its binding to fibronectin is of some benefit to its parasites. Besides, as a pro-inflammatory factor, PGE<sub>2</sub> was secreted by host cells to activate innate immune system to defend the pathogens impair [20,72,73]. Thus, the inhibition of PGE<sub>2</sub> to *S. aureus* invasion demonstrated the defense reaction of the host to the harmful stimulation by such pathogen.

According to previous reports, chronic inflammation was suggested to promote cancer development by inducing the COX-2/PGE<sub>2</sub> pathway and activating NF- $\kappa$ B and Stat3 signals [33,34]. This can be confirmed by the findings that regular use of non-steroidal anti-inflammatory drugs (NSAIDs) can reduce risk of gastrointestinal cancer and the growth of head and neck cancer [74–76] through blockading COX-1 and COX-2 activities, which subsequently suppresses prostaglandin, including PGE<sub>2</sub>, biosynthesis. In view of our present observations that *S. aureus* increases PGE<sub>2</sub> production by HOK and PGE<sub>2</sub> in turn facilitates the growth and adherence of *S. aureus*, further studies seeking for the probable mediating roles of COX-2/PGE<sub>2</sub> pathway in the relationship between inflammation and cancer can be conducted, which may suggest COX-2/PGE<sub>2</sub> axis targeting strategies for the prevention and treatment of inflammation and cancer diseases.

## Conclusion

To fully realize the potential of PGE<sub>2</sub> targeting in the therapy of inflammation and cancer, sufficient investigations on the versatility of PGE<sub>2</sub> are considerably essential. Here in this study, we first confirmed that *S. aureus* can up-regulated the COX-2 transcription and increased PGE<sub>2</sub> production by the normal oral epithelial cell line HOK. Using the purified PGE<sub>2</sub> and the supernatants, we found that in case of infection, *S. aureus* can intellectually take advantage of the surrounding PGE<sub>2</sub> to increase its growth and adherence. These findings revealed a new look to the pathogenic mechanism of *S. aureus* and may lead to new therapeutic strategies with higher potency and improved selectivity.

## Supporting information

**S1 Fig. The number of *S. aureus* before and after incubated in DMEM for 45 min.** Before incubated in DMEM, the initial number of *S. aureus* [*S. aureus* (before)] and *S. aureus* with PGE<sub>2</sub> treated [*S. aureus* +PGE<sub>2</sub> (before)] used for adhesion and invasion assay were approximately  $2.63 \times 10^7$  CUFs /mL and  $2.57 \times 10^7$  CUFs/mL. After treated in DMEM for 45 min, the numbers for them were  $2.38 \times 10^7$  CUFs/mL [*S. aureus* (after)] and  $2.25 \times 10^7$  CUFs/mL [*S. aureus* + PGE<sub>2</sub> (after)] respectively. There was no significantly difference between all the groups.

(TIF)



## Acknowledgments

We thank the professor Chaoliang Zhang for his assistant for performing confocal laser scanning microscopy in the fibronectin assay, Liying Hao for assisting with CSC38/tipless probes availability and atomic force microscope scanning. We also thank Xinxuan Zhou for facilitating the obtain of *S. aureus* and Wei Qiu and Suping Wang for assisting with images acquisition of confocal laser scanning microscopy.

## Author Contributions

**Conceptualization:** LC XZ BR.

**Data curation:** YW.

**Formal analysis:** BR LC MF.

**Funding acquisition:** BR XZ MF LC.

**Investigation:** YW SL YZ.

**Methodology:** BR MF YW BL.

**Project administration:** MF LC XZ.

**Resources:** XZ ML.

**Supervision:** LC BR XZ.

**Validation:** LC BR.

**Visualization:** YJ ML.

**Writing – original draft:** YW.

**Writing – review & editing:** LC BR MF.

## References

1. Walia IS, Borle RM, Mehendiratta D, Yadav AO. Microbiology and antibiotic sensitivity of head and neck space infections of odontogenic origin. *J Maxillofac Oral Surg.* 2014; 13(1):16–21. <https://doi.org/10.1007/s12663-012-0455-6> PMID: 24644391
2. Ohara-Nemoto Y, Haraga H, Kimura S, Nemoto T. Occurrence of staphylococci in the oral cavities of healthy adults and nasal–oral trafficking of the bacteria. *J Med Microbiol.* 2008; 57(1):95–9.
3. McCormack M, Smith A, Akram A, Jackson M, Robertson D, Edwards G. Staphylococcus aureus and the oral cavity: An overlooked source of carriage and infection? *Am J Infect Control.* 2015; 43(1):35–7. <https://doi.org/10.1016/j.ajic.2014.09.015> PMID: 25564121
4. Zaleckas L, Rasteniene R, Rimkuviene J, Seselgyte R. Retrospective analysis of cellulitis of the floor of the mouth. *Stomatologija.* 2010; 12(1):23–7. PMID: 20440093
5. Green A, Flower E, New N. case report: Mortality associated with odontogenic infection! *Br Dent J.* 2001; 190(10):529–30. <https://doi.org/10.1038/sj.bdj.4801024a> PMID: 11411886
6. Balkwill F, Mantovani A. Inflammation and cancer: back to Virchow? *Lancet.* 2001; 357(9255):539–45. [https://doi.org/10.1016/S0140-6736\(00\)04046-0](https://doi.org/10.1016/S0140-6736(00)04046-0) PMID: 11229684
7. Coussens LM, Werb Z. Inflammation and cancer. *Nature.* 2002; 420(6917):860–7. <https://doi.org/10.1038/nature01322> PMID: 12490959
8. Park JY, Pillinger MH, Abramson SB. Prostaglandin E 2 synthesis and secretion: the role of PGE 2 synthases. *Clin Immunol.* 2006; 119(3):229–40. <https://doi.org/10.1016/j.clim.2006.01.016> PMID: 16540375
9. Dubois RN, Abramson SB, Crofford L, Gupta RA, Simon LS, Van De Putte LB, et al. Cyclooxygenase in biology and disease. *FASEB J.* 1998; 12(12):1063–73. PMID: 9737710

10. Griffin ÉW, Skelly DT, Murray CL, Cunningham C. Cyclooxygenase-1-dependent prostaglandins mediate susceptibility to systemic inflammation-induced acute cognitive dysfunction. *J Neurosci*. 2013; 33(38):15248–58. <https://doi.org/10.1523/JNEUROSCI.6361-11.2013> PMID: 24048854
11. Menter DG, Schilsky RL, DuBois RN. Cyclooxygenase-2 and cancer treatment: understanding the risk should be worth the reward. *Clin Cancer Res*. 2010; 16(5):1384–90. <https://doi.org/10.1158/1078-0432.CCR-09-0788> PMID: 20179228
12. Chandrasekharan N, Dai H, Roos KLT, Evanson NK, Tomsik J, Elton TS, et al. COX-3, a cyclooxygenase-1 variant inhibited by acetaminophen and other analgesic/antipyretic drugs: cloning, structure, and expression. *Proc Natl Acad Sci U S A*. 2002; 99(21):13926–31. <https://doi.org/10.1073/pnas.162468699> PMID: 12242329
13. Sierra JC, Hobbs S, Chaturvedi R, Yan F, Wilson KT, Peek RM, et al. Induction of COX-2 expression by *Helicobacter pylori* is mediated by activation of epidermal growth factor receptor in gastric epithelial cells. *Am J Physiol Gastrointest Liver Physiol*. 2013; 305(2):G196–G203. <https://doi.org/10.1152/ajpgi.00495.2012> PMID: 23681474
14. Roelofs HM, Te Morsche RH, van Heumen BW, Nagengast FM, Peters WH. Over-expression of COX-2 mRNA in colorectal cancer. *BMC Gastroenterol*. 2014; 14(1):1.
15. Gallo O, Masini E, Bianchi B, Bruschini L, Paglierani M, Franchi A. Prognostic significance of cyclooxygenase-2 pathway and angiogenesis in head and neck squamous cell carcinoma. *Hum Pathol*. 2002; 33(7):708–14. PMID: 12196922
16. Moraitis D, Du B, De Lorenzo MS, Boyle JO, Weksler BB, Cohen EG, et al. Levels of cyclooxygenase-2 are increased in the oral mucosa of smokers: evidence for the role of epidermal growth factor receptor and its ligands. *Cancer Res*. 2005; 65(2):664–70. PMID: 15695412
17. Pérez-Novo CA, Waeytens A, Claeys C, Van Cauwenberge P, Bachert C. *Staphylococcus aureus* enterotoxin B regulates prostaglandin E2 synthesis, growth, and migration in nasal tissue fibroblasts. *J Infect Dis*. 2008; 197(7):1036–43. <https://doi.org/10.1086/528989> PMID: 18419541
18. Somayaji SN, Ritchie S, Sahraei M, Marriott I, Hudson MC. *Staphylococcus aureus* induces expression of receptor activator of NF-κB ligand and prostaglandin E2 in infected murine osteoblasts. *Infect Immun*. 2008; 76(11):5120–6. <https://doi.org/10.1128/IAI.00228-08> PMID: 18765718
19. Phipps RP, Stein SH, Roper RL. A new view of prostaglandin E regulation of the immune response. *Immunol Today*. 1991; 12(10):349–52. [https://doi.org/10.1016/0167-5699\(91\)90064-Z](https://doi.org/10.1016/0167-5699(91)90064-Z) PMID: 1958288
20. Kalinski P. Regulation of immune responses by prostaglandin E2. *J Immunol*. 2012; 188(1):21–8. <https://doi.org/10.4049/jimmunol.1101029> PMID: 22187483
21. Nakanishi M, Rosenberg DW, editors. Multifaceted roles of PGE2 in inflammation and cancer. *Semin Immunopathol*; 2013 21: Springer.
22. Nakayama T, Mutsuga N, Yao L, Tosato G. Prostaglandin E2 promotes degranulation-independent release of MCP-1 from mast cells. *J Leukoc Biol*. 2006; 79(1):95–104. <https://doi.org/10.1189/jlb.0405226> PMID: 16275896
23. Harris SG, Padilla J, Koumas L, Ray D, Phipps RP. Prostaglandins as modulators of immunity. *Trends Immunol*. 2002; 23(3):144–50. PMID: 11864843
24. Linnemeyer P, Pollack S. Prostaglandin E2-induced changes in the phenotype, morphology, and lytic activity of IL-2-activated natural killer cells. *J Immunol*. 1993; 150(9):3747–54. PMID: 8386202
25. Sreeramkumar V, Fresno M, Cuesta N. Prostaglandin E2 and T cells: friends or foes? *Med Humanit*. 2012; 90(6):579–86.
26. Agard M, Asakrah S, Morici LA. PGE2 suppression of innate immunity during mucosal bacterial infection. *Front Cell Infect Microbiol*. 2013; 3:45. <https://doi.org/10.3389/fcimb.2013.00045> PMID: 23971009
27. Obermajer N, Muthuswamy R, Lesnock J, Edwards RP, Kalinski P. Positive feedback between PGE2 and COX2 redirects the differentiation of human dendritic cells toward stable myeloid-derived suppressor cells. *Blood*. 2011; 118(20):5498–505. <https://doi.org/10.1182/blood-2011-07-365825> PMID: 21972293
28. Obermajer N, Wong JL, Edwards RP, Odunsi K, Moysich K, Kalinski P. PGE2-driven induction and maintenance of cancer-associated myeloid-derived suppressor cells. *Immunol Invest*. 2012; 41(6–7):635–57. <https://doi.org/10.3109/08820139.2012.695417> PMID: 23017139
29. Goto T, Herberman R, Maluish A, Strong D. Cyclic AMP as a mediator of prostaglandin E-induced suppression of human natural killer cell activity. *J Immunol*. 1983; 130(3):1350–5. PMID: 6185577
30. Pietra G, Manzini C, Rivara S, Vitale M, Cantoni C, Petretto A, et al. Melanoma cells inhibit natural killer cell function by modulating the expression of activating receptors and cytolytic activity. *Cancer Res*. 2012; 72(6):1407–15. <https://doi.org/10.1158/0008-5472.CAN-11-2544> PMID: 22258454

31. Aronoff DM, Canetti C, Peters-Golden M. Prostaglandin E2 inhibits alveolar macrophage phagocytosis through an E-prostanoid 2 receptor-mediated increase in intracellular cyclic AMP. *J Immunol.* 2004; 173(1):559–65. PMID: [15210817](#)
32. Serezani CH, Chung J, Ballinger MN, Moore BB, Aronoff DM, Peters-Golden M. Prostaglandin E2 suppresses bacterial killing in alveolar macrophages by inhibiting NADPH oxidase. *Am J Respir Cell Mol Biol.* 2007; 37(5):562–70. <https://doi.org/10.1165/rcmb.2007-0153OC> PMID: [17585108](#)
33. Grivennikov SI, Greten FR, Karin M. Immunity, inflammation, and cancer. *Cell.* 2010; 140(6):883–99. <https://doi.org/10.1016/j.cell.2010.01.025> PMID: [20303878](#)
34. Wang D, DuBois RN. The role of COX-2 in intestinal inflammation and colorectal cancer. *Oncogene.* 2010; 29(6):781–8. <https://doi.org/10.1038/onc.2009.421> PMID: [19946329](#)
35. Noverr MC, Phare SM, Toews GB, Coffey MJ, Huffnagle GB. Pathogenic yeasts *Cryptococcus neoformans* and *Candida albicans* produce immunomodulatory prostaglandins. *Infect Immun.* 2001; 69(5):2957–63. <https://doi.org/10.1128/IAI.69.5.2957-2963.2001> PMID: [11292712](#)
36. Kalo-Klein A, Witkin SS. Prostaglandin E2 enhances and gamma interferon inhibits germ tube formation in *Candida albicans*. *Infect Immun.* 1990; 58(1):260–2. PMID: [2152888](#)
37. Krause J, Geginat G, Tammer I. Prostaglandin E 2 from *Candida albicans* stimulates the growth of *Staphylococcus aureus* in mixed biofilms. *PloS one.* 2015; 10(8):e0135404. <https://doi.org/10.1371/journal.pone.0135404> PMID: [26262843](#)
38. Hussain M, Hagggar A, Peters G, Chhatwal GS, Herrmann M, Flock J-I, et al. More than one tandem repeat domain of the extracellular adherence protein of *Staphylococcus aureus* is required for aggregation, adherence, and host cell invasion but not for leukocyte activation. *Infect Immun.* 2008; 76(12):5615–23. <https://doi.org/10.1128/IAI.00480-08> PMID: [18794290](#)
39. Mongodin E, Bajolet O, Cutrona J, Bonnet N, Dupuit F, Puchelle E, et al. Fibronectin-binding proteins of *Staphylococcus aureus* are involved in adherence to human airway epithelium. *Infect Immun.* 2002; 70(2):620–30. PMID: [11796591](#)
40. Foster T. The remarkably multifunctional fibronectin binding proteins of *Staphylococcus aureus*. *Eur J Clin Microbiol Infect Dis.* 2016:1–9.
41. Greene C, McDevitt D, Francois P, Vaudaux P, Lew DP, Poster T. Adhesion properties of mutants of *Staphylococcus aureus* defective in fibronectin-binding proteins and studies on the expression of fnb genes. *Mol Microbiol.* 1995; 17(6):1143–52. PMID: [8594333](#)
42. Nguyen V, Huggins RH, Lertsburapa T, Bauer K, Rademaker A, Gerami P, et al. Cutaneous T-cell lymphoma and *Staphylococcus aureus* colonization. *J Am Acad Dermatol.* 2008; 59(6):949–52. <https://doi.org/10.1016/j.jaad.2008.08.030> PMID: [18835065](#)
43. Ouellet M, Percival MD. Effect of inhibitor time-dependency on selectivity towards cyclooxygenase isoforms. *Biochem J.* 1995; 306 (Pt1):247–51.
44. Zhu YM, Azahri NS, Yu DC, Woll PJ. Effects of COX-2 inhibition on expression of vascular endothelial growth factor and interleukin-8 in lung cancer cells. *BMC Cancer.* 2008; 8:218. <https://doi.org/10.1186/1471-2407-8-218> PMID: [18671849](#)
45. Takagi M, Yamamoto D, Ogawa S, Otoi T, Ohtani M, Miyamoto A. Messenger RNA expression of angiotensin-converting enzyme, endothelin, cyclooxygenase-2 and prostaglandin synthases in bovine placentomes during gestation and the postpartum period. *Vet J.* 2008; 177(3):398–404. <https://doi.org/10.1016/j.tvjl.2007.05.017> PMID: [17804266](#)
46. Zbinden C, Stephan R, Johler S, Borel N, Bünter J, Bruckmaier RM, et al. The inflammatory response of primary bovine mammary epithelial cells to *Staphylococcus aureus* strains is linked to the bacterial phenotype. *PloS one.* 2014; 9(1):e87374. <https://doi.org/10.1371/journal.pone.0087374> PMID: [24498088](#)
47. Chen JH, Perry CJ, Tsui Y-C, Staron MM, Parish IA, Dominguez CX, et al. Prostaglandin E2 and programmed cell death 1 signaling coordinately impair CTL function and survival during chronic viral infection. *Nat Med.* 2015; 21(4):327–34. <https://doi.org/10.1038/nm.3831> PMID: [25799228](#)
48. Peeters E, Nelis HJ, Coenye T. Comparison of multiple methods for quantification of microbial biofilms grown in microtiter plates. *J Microbiol Methods.* 2008; 72(2):157–65. <https://doi.org/10.1016/j.mimet.2007.11.010> PMID: [18155789](#)
49. Peacock S, Day N, Thomas M, Berendt A, Foster T. Clinical isolates of *Staphylococcus aureus* exhibit diversity in fnb genes and adhesion to human fibronectin. *J Infect.* 2000; 41(1):23–31. <https://doi.org/10.1053/jinf.2000.0657> PMID: [10942636](#)
50. Ridley RA, Douglas I, Whawell SA. Differential adhesion and invasion by *Staphylococcus aureus* of epithelial cells derived from different anatomical sites. *J Med Microbiol.* 2012; 61(12):1654–61.
51. Wang C, Zhao Y, Zheng S, Xue J, Zhou J, Tang Y, et al. Effect of enamel morphology on nanoscale adhesion forces of streptococcal bacteria: an AFM study. *Scanning.* 2015; 37(5):313–21. <https://doi.org/10.1002/sca.21218> PMID: [26482011](#)

52. Mei L, Ren Y, Busscher H, Chen Y, Van der Mei H. Poisson analysis of streptococcal bond-strengthening on saliva-coated enamel. *J Dent Res.* 2009; 88(9):841–5. <https://doi.org/10.1177/0022034509342523> PMID: 19767582
53. Agerer F, Michel A, Ohlsen K, Hauck CR. Integrin-mediated invasion of *Staphylococcus aureus* into human cells requires Src family protein-tyrosine kinases. *J Biol Chem.* 2003; 278(43):42524–31. <https://doi.org/10.1074/jbc.M302096200> PMID: 12893831
54. Chan G, Boyle JO, Yang EK, Zhang F, Sacks PG, Shah JP, et al. Cyclooxygenase-2 expression is up-regulated in squamous cell carcinoma of the head and neck. *Cancer Res.* 1999; 59(5):991–4. PMID: 10070952
55. Gallo O, Franchi A, Magnelli L, Sardi I, Vannacci A, Boddit V, et al. Cyclooxygenase-2 pathway correlates with VEGF expression in head and neck cancer. Implications for tumor angiogenesis and metastasis. *Neoplasia.* 2001; 3(1):53–61. <https://doi.org/10.1038/sj/neo/7900127> PMID: 11326316
56. Kyzas PA, Stefanou D, Agnantis NJ. COX-2 expression correlates with VEGF-C and lymph node metastases in patients with head and neck squamous cell carcinoma. *Mod Pathol.* 2005; 18(1):153–60. <https://doi.org/10.1038/modpathol.3800244> PMID: 15272284
57. Futaki N, Takahashi S, Yokoyama M, Arai I, Higuchi S, Otomo S. NS-398, a new anti-inflammatory agent, selectively inhibits prostaglandin G/H synthase/cyclooxygenase (COX-2) activity in vitro. *Prostaglandins.* 1994; 47(1):55–9. PMID: 8140262
58. Kim J, Shim M. COX-2 inhibitor NS-398 suppresses doxorubicin-induced p53 accumulation through inhibition of ROS-mediated Jnk activation. *Mol Carcinog.* 2016.
59. Altrock E, Vasel M, Kawelke N, Dooley S, Sottile J, Nakchbandi I. Inflammatory cell infiltration in experimental liver fibrosis is affected by inhibition of fibronectin matrix assembly. *Zeitschrift für Gastroenterologie.* 2015; 53(01):A1\_29.
60. HOOK M, Switalski L, Wadstrom T, Lindberg M. Interactions of pathogenic microorganisms with fibronectin. *Fibronectin.* 1989; 1:295–308.
61. McCrae M. *Molecular Aspects of Host-Pathogen Interactions*: Cambridge University Press; 1997 50.
62. Mirvish ED, Pomerantz RG, Geskin LJ. Infectious agents in cutaneous T-cell lymphoma. *J Am Acad Dermatol.* 2011; 64(2):423–31. <https://doi.org/10.1016/j.jaad.2009.11.692> PMID: 20692726
63. Paupière S, Millot F, Grados F, Fardellone P. Primary lymphoma of bone infected with *Staphylococcus aureus*. *Joint Bone Spine.* 2013; 6(80):669–70.
64. Kullander J, Forslund O, Dillner J. *Staphylococcus aureus* and squamous cell carcinoma of the skin. *Cancer Epidemiol Biomarkers Prev.* 2009; 18(2):472–8. <https://doi.org/10.1158/1055-9965.EPI-08-0905> PMID: 19155437
65. Greenhough A, Smartt HJ, Moore AE, Roberts HR, Williams AC, Paraskeva C, et al. The COX-2/PGE2 pathway: key roles in the hallmarks of cancer and adaptation to the tumour microenvironment. *Carcinogenesis.* 2009; 30(3):377–86. <https://doi.org/10.1093/carcin/bgp014> PMID: 19136477
66. Kopp KLM, Kauczok CS, Lauenborg B, Krejsgaard T, Eriksen KW, Zhang Q, et al. COX-2-dependent PGE2 acts as a growth factor in mycosis fungoides (MF). *Leukemia.* 2010; 24(6):1179–85. <https://doi.org/10.1038/leu.2010.66> PMID: 20428208
67. Talpur R, Bassett R, Duvic M. Prevalence and treatment of *Staphylococcus aureus* colonization in patients with mycosis fungoides and Sézary syndrome. *Br J Dermatol.* 2008; 159(1):105–12. <https://doi.org/10.1111/j.1365-2133.2008.08612.x> PMID: 18489588
68. Dziejwanowska K, Carson AR, Patti JM, Deobald CF, Bayles KW, Bohach GA. Staphylococcal fibronectin binding protein interacts with heat shock protein 60 and integrins: role in internalization by epithelial cells. *Infect Immun.* 2000; 68(11):6321–8. PMID: 11035741
69. Kintarak S, Whawell SA, Speight PM, Packer S, Nair SP. Internalization of *Staphylococcus aureus* by human keratinocytes. *Infect Immun.* 2004; 72(10):5668–75. <https://doi.org/10.1128/IAI.72.10.5668-5675.2004> PMID: 15385465
70. Van de Water L, Destree A, Hynes R. Fibronectin binds to some bacteria but does not promote their uptake by phagocytic cells. *Science.* 1983; 220(4593):201–4. PMID: 6338594
71. Verbrugh HA, Peterson P, Smith D, Nguyen B, Hoidal JR, Wilkinson B, et al. Human fibronectin binding to staphylococcal surface protein and its relative inefficiency in promoting phagocytosis by human polymorphonuclear leukocytes, monocytes, and alveolar macrophages. *Infect Immun.* 1981; 33(3):811–9. PMID: 7287184
72. Hara S, Kamei D, Sasaki Y, Tanemoto A, Nakatani Y, Murakami M. Prostaglandin E synthases: understanding their pathophysiological roles through mouse genetic models. *Biochimie.* 2010; 92(6):651–9. <https://doi.org/10.1016/j.biochi.2010.02.007> PMID: 20159030
73. Sakata D, Yao C, Narumiya S. Prostaglandin E2, an immunoactivator. *J Pharmacol Sci.* 2010; 112(1):1–5. PMID: 20051652

74. Sheng H, Shao J, Kirkland SC, Isakson P, Coffey RJ, Morrow J, et al. Inhibition of human colon cancer cell growth by selective inhibition of cyclooxygenase-2. *J Clin Invest*. 1997; 99(9):2254. <https://doi.org/10.1172/JCI119400> PMID: 9151799
75. Ondrey FG, Juhn SK, Adams GL. Inhibition of head and neck tumor cell growth with arachidonic acid metabolism inhibition. *Laryngoscope*. 1996; 106(2):129–34.
76. Thun MJ, Jacobs EJ, Patrono C. The role of aspirin in cancer prevention. *Nat Rev Clin Oncol*. 2012; 9(5):259–67. <https://doi.org/10.1038/nrclinonc.2011.199> PMID: 22473097
